# Supplementary material for: Chemically-doped graphene with improved surface plasmon characteristics: an optical near-field study
Source: Royal Society of Chemistry journal article supplement (doi:10.1039/c6nr04239b), 2016-01-01
Supplement: c6nr04239b1.pdf [file c6nr04239b1.pdf]

## Electronic Supplementary Information

### Chemically-Doped Graphene with Improved Surface Plasmon

#### Characteristics: An Optical Near-field Study

Zebo Zheng,<sup>ad</sup> Weiliang Wang,<sup>d</sup> Teng Ma,<sup>c</sup> Zexiang Deng,<sup>d</sup> Yanlin Ke,<sup>ab</sup> Runze Zhan,<sup>a</sup> Qionghui Zou,<sup>ad</sup>  
Wencai Ren,<sup>c</sup> Jun Chen,<sup>ab</sup> Juncong She,<sup>ab</sup> Yu Zhang,<sup>ab</sup> Fei Liu,<sup>ab</sup> Huanjun Chen,<sup>ab\*</sup> Shaozhi Deng,<sup>ab\*</sup>  
Ningsheng Xu<sup>ab</sup>

---

<sup>a</sup> † *State Key Laboratory of Optoelectronic Materials and Technologies, Guangdong Province Key Laboratory of Display Material and Technology, Sun Yat-sen University, Guangzhou 510275, China.*

<sup>a</sup> School of Electronics and Information Technology, Sun Yat-sen University, Guangzhou 510006, China.

<sup>b</sup> Shenyang National Laboratory for Materials Science, Institute of Metal Research, Chinese Academy of Sciences, 72 Wenhua Road, Shenyang 110016, China.

<sup>c</sup> School of Physics, Sun Yat-sen University, Guangzhou 510275, China

\* Corresponding Authors: [chenhj8@mail.sysu.edu.cn](mailto:chenhj8@mail.sysu.edu.cn); [stdsz@mail.sysu.edu.cn](mailto:stdsz@mail.sysu.edu.cn)

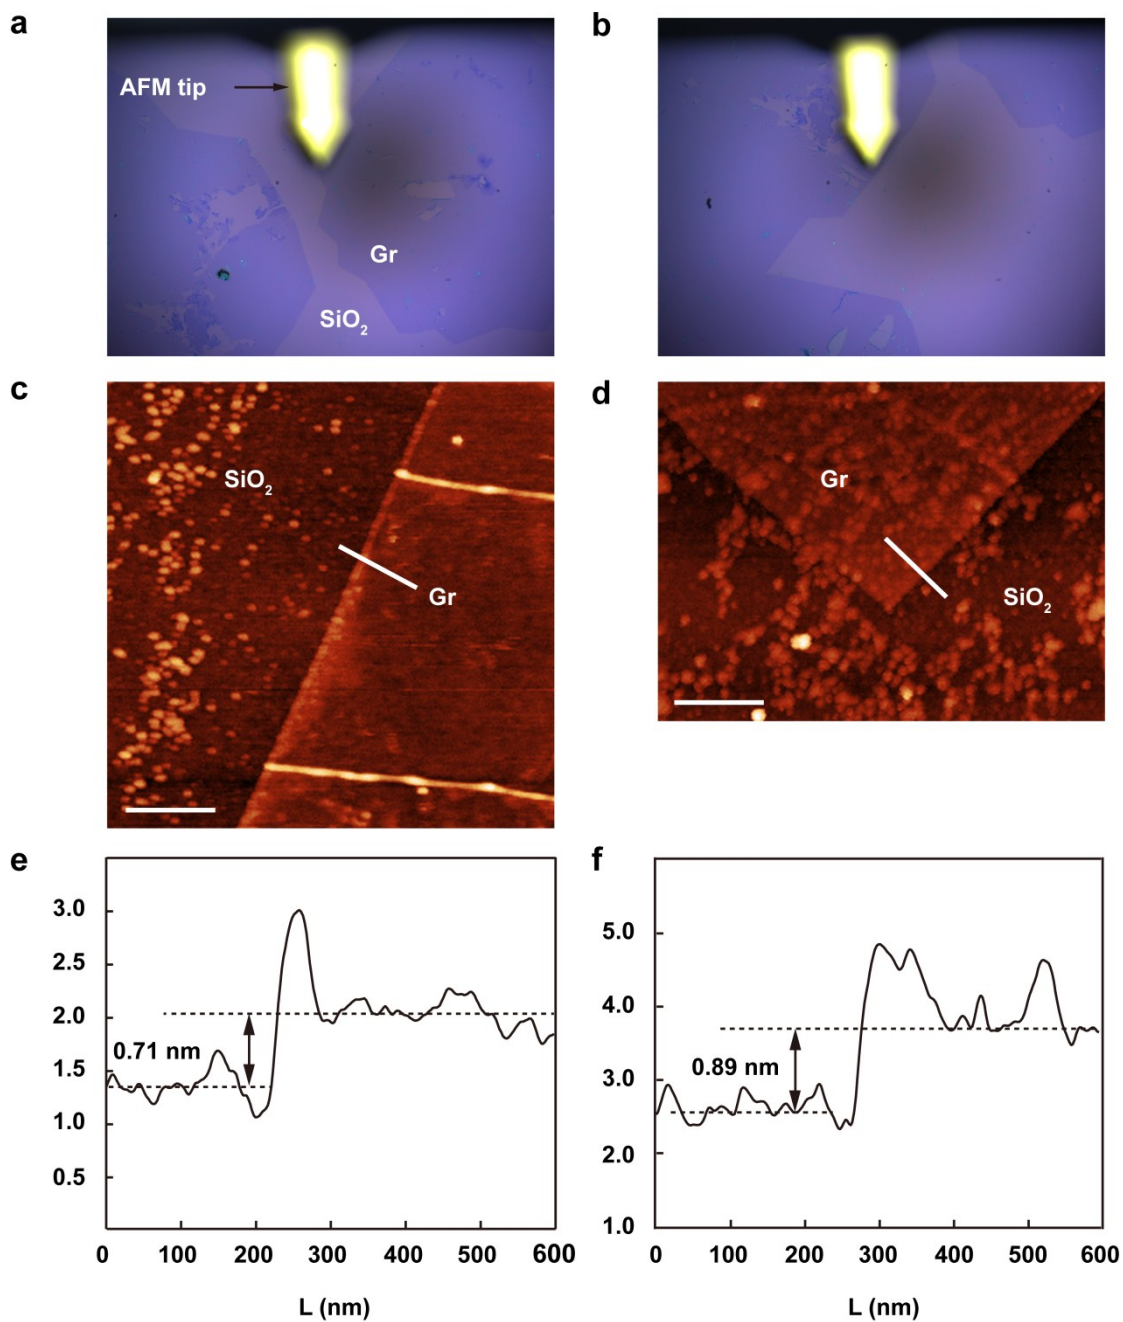

**Fig. S1** Optical image and AFM topography of the HNO<sub>3</sub>-doped graphene. (a, b) Optical images of two representative graphene flakes after doped with HNO<sub>3</sub>. (c, d) Corresponding topographies of the graphene flakes shown in (a) and (b), respectively. (e, f) Height profiles extracted from topography images shown in (c) and (d), respectively.

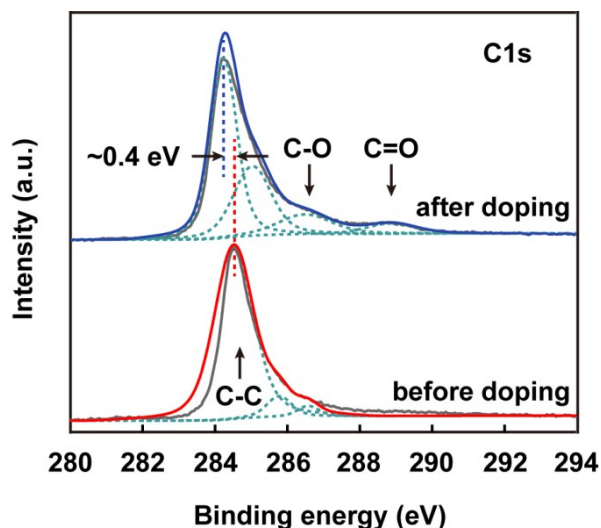

**Fig. S2** XPS spectra of the pristine (lower) and HNO<sub>3</sub>-doped (upper) graphene. The C1s peak corresponding to sp<sup>2</sup> and sp<sup>3</sup> hybridization states was shifted to low energy (from ~ 284.58 eV to ~ 284.18 eV) by the HNO<sub>3</sub> doping.

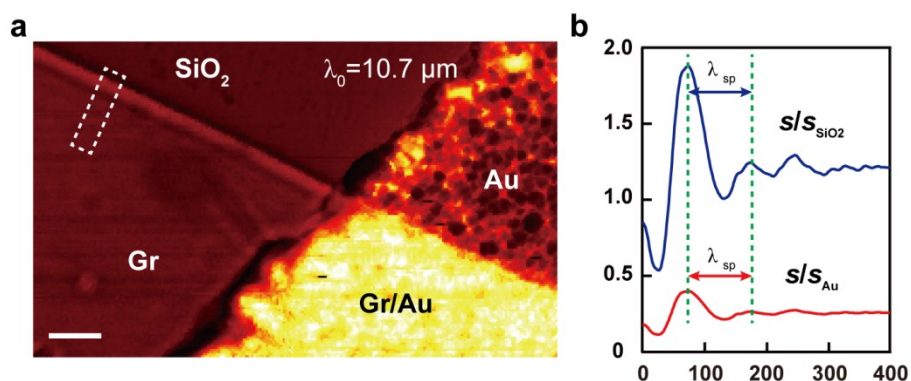

**Fig. S3** Plasmon wavelengths deduced from different data normalization methods. (a) Near-field optical image of the monolayer graphene under excitation of 10.70  $\mu\text{m}$ . The monolayer graphene was placed with one part lying on the gold film and the other part on the SiO<sub>2</sub> substrate. Scale bar: 250 nm. (b) Extracted profiles of the near-field optical amplitudes from white-dashed rectangle shown in (a). The profile was normalized to the gold (red) or SiO<sub>2</sub> (blue).

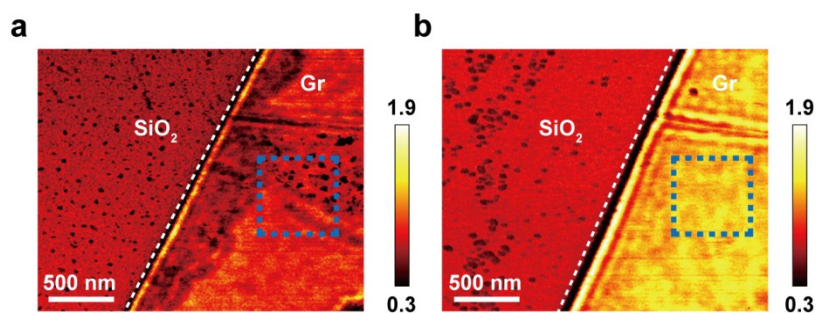

**Fig. S4** Optical near-field characteristics of the graphene before and after the HNO<sub>3</sub> doping. (a) Normalized optical near-field imaging of the plasmon waves near edges of the pristine graphene. (b) Normalized optical near-field imaging of the plasmon waves near edges of the chemically-doped graphene. The blue squares depicted the areas where root-mean square of amplitudes of the near-field optical amplitudes were calculated.

**Table S1.** Binding energy of the H<sub>2</sub>O molecule on the graphene obtained from the DFT calculations.

|                           | Binding energy without the<br>NO <sub>3</sub> <sup>-</sup> group (eV) | Binding energy with the NO <sub>3</sub> <sup>-</sup><br>group (eV) |
|---------------------------|-----------------------------------------------------------------------|--------------------------------------------------------------------|
| H <sub>2</sub> O molecule | 0.026                                                                 | -0.001                                                             |
